# Supplementary material for: Dietary Chitosan Oligosaccharide Supplementation Improves Meat Quality by Improving Antioxidant Capacity and Fiber Characteristics in the Thigh Muscle of Broilers
Source: MDPI journal article supplement (doi:10.3390/antiox13030366), 2024-03-18
Supplement: s1 [file s1]

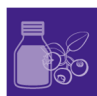**Table S1.** Ingredient composition and nutrient content of diets

| Item                                | Day 1 to 22 | Day 22 to 42 |
|-------------------------------------|-------------|--------------|
| Ingredients, %                      |             |              |
| Corn                                | 54.57       | 62.44        |
| Soybean meal, 48% crude protein     | 29.95       | 25.58        |
| Corn gluten meal, 60% crude protein | 5.90        | 3.30         |
| Soybean oil                         | 5.50        | 4.89         |
| Tricalcium phosphate                | 2.46        | 2.29         |
| Limestone                           | 0.89        | 0.75         |
| Salt                                | 0.20        | 0.20         |
| DL-Met, 88%                         | 0.07        | 0.07         |
| L-Lys·HCl (78.4%)                   | 0.06        | 0.08         |
| Vitamin premix <sup>2</sup>         | 0.20        | 0.20         |
| Mineral premix <sup>3</sup>         | 0.20        | 0.20         |
| Calculated composition              |             |              |
| Metabolic energy, MJ/kg             | 12.95       | 12.74        |
| Crude protein, %                    | 21.89       | 18.90        |
| Calcium, %                          | 1.05        | 0.96         |
| Lys, %                              | 1.12        | 1.01         |
| Met + Lys, %                        | 0.90        | 0.86         |
| Available phosphorus, %             | 0.81        | 0.73         |
| Analyzed composition, %             |             |              |
| Crude protein                       | 21.12       | 20.02        |
| Calcium                             | 1.03        | 0.95         |
| Met + Lys                           | 0.89        | 0.87         |
| Available phosphorus                | 0.44        | 0.42         |

<sup>1</sup> Provided per kilogram of complete diet: 12,8000 IU vitamin A, 1,600 IU vitamin D<sub>3</sub>, 60 IU vitamin E, 1.6mg vitamin K<sub>3</sub>, 0.12mg biotin, 50mg choline, 1.2mg folic acid, 32mg Nicotinic acid, 16mg pantothenic acid, 4.8mg riboflavin, 2.4mg thiamine (B<sub>1</sub>), 3.2mg vitamin B<sub>6</sub>, and 0.03mg vitamin B<sub>12</sub>.

<sup>2</sup> Provided per kilogram of diet: Mg, 79mg as manganese oxide; Zn, 60mg as zinc oxide; Cu, 100mg as copper sulfate; Fe, 120mg as iron sulfate; I, 0.96mg as potassium iodine; Co, 0.16mg as cobalt sulfate and Se, 0.24mg as sodium selenite.

**Table S2.** The commercial kits information

| Index <sup>1</sup>           | Name of kits                                                        | Cat. No. |
|------------------------------|---------------------------------------------------------------------|----------|
| MDA                          | Malondialdehyde (MDA) assay kit (TBA method)                        | A003-1-2 |
| CAT                          | Catalase (CAT) assay kit (Visible light)                            | A007-1-1 |
| GSH-Px                       | Glutathione peroxidase (GSH-PX) assay kit (colorimetry)             | A005-1-2 |
| T-SOD                        | Total Superoxide Dismutase (T-SOD) assay kit (Hydroxylamine method) | A001-1-2 |
| O <sub>2</sub> <sup>·-</sup> | Inhibition and produce superoxide anion assay kit                   | A082-3-1 |
| OH <sup>·-</sup>             | Hydroxyl Free Radical assay kit                                     | A018-1-1 |
| ABTS <sup>·-</sup>           | ABTS free radical scavenging capacity assay kit                     | A015-2-1 |

<sup>1</sup> MDA, malondialdehyde; GSH-Px, glutathione peroxidase; T-SOD, total superoxide dismutase; CAT, catalase; O<sub>2</sub><sup>·-</sup>, oxygen radical; OH<sup>·-</sup>, hydroxyl radical; ABTS<sup>·-</sup>, 2, 2'-azino-bis (3-ethylbenzothiazoline-6-sulfonate).

**Table S3.** The primer sequences

| Gene <sup>1</sup> | Accession NO.  | Primer sequence (5' to 3')                                  |
|-------------------|----------------|-------------------------------------------------------------|
| <i>β-actin</i>    | NM_205518.1    | F: ATCCGGACCCTCCATTGTC<br>R: AGCCATGCCAATCTCGTCTT           |
| <i>SREBP-1c</i>   | XM_046927256.1 | F: CATCCATCAACGACAAGATCGT<br>R: CTCAGGATCGCCGACTTGTT        |
| <i>ACC</i>        | XM_046929960.1 | F: GCTTCCCATTGCGCTCCTA<br>R: GCCATTCTCACCACCTGATTACTG       |
| <i>FAS</i>        | NM_205155.4    | F: TTTGGTGGTTTCGAGGTGGTA<br>R: CAAAGGTTGTATTTTCGGGAGC       |
| <i>PPARα</i>      | XM_046906400.1 | F: TTAAACGGAGTTCCAATGGC<br>R: AACCTTACAACCTTCACAAGC         |
| <i>CPT-1</i>      | XM_046918285.1 | F: TAGAGGGCGTGGACCAATAA<br>R: TGGGATGCGGGAGGTATT            |
| <i>PPARγ</i>      | NM_001001460   | F: CAGTGGATCTGTCTGCGATG<br>R: CTTTGGCAATCCTGGAGCTTG         |
| <i>C/EBPα</i>     | NM_001031459   | F: GACATCTGCGAGAACGAGCA<br>R: GCATGCCGTGGAAATCGAAA          |
| <i>C/EBPβ</i>     | NM_205253.2    | F: GCCGCCCCGCCTTTAAA<br>R: CCAAACAGTCCGCCTCGTAA             |
| <i>Nrf2</i>       | NM_205117.1    | F: GAGAGCGGCAGCAAGATGACAG<br>R: CAGCCAGGTGTGGTTGTAGAAGTC    |
| <i>HO-1</i>       | XM_205344.1    | F: GATGTGCGGATACCTGAAGC<br>R: AGGGATGCCAACATGACTGA          |
| <i>GPX1</i>       | NM_000581.4    | F: GCATTGTTTCTAGCTTGCGGT<br>R: TCCTCCTGAGAACGGACTGT         |
| <i>Cu/Zn SOD</i>  | NM_205064.1    | F: ACCCTTTTGCCTTGAAACT<br>R: TTGAGATGTTTGCGTGAAG            |
| <i>CAT</i>        | NM_001031215.2 | F: GGGGAAGAGCGCGAGACGGA<br>R: CGTCATTGTATGGGTGATGG          |
| <i>CaN</i>        | XM_025149952.1 | F: TTGTCTGATGGAGATCATGGCTTC<br>R: TGCTTGCCTTCAGGATTAAAGTGAG |
| <i>CaM</i>        | NM_205005.2    | F: GATGAGATCCTGAGAGTGGTGGAC<br>R: TCATCAGGTAAGGTGGGCACAA    |
| <i>NFATc1</i>     | XM_025147636.1 | F: GGTCTTCCGAGTTCACATCC<br>R: TCTCCACCAGAGGCAGTTCT          |
| <i>MyoD</i>       | NM_204214.2    | F: AACCTGAGTGACAGTGGAGC<br>R: TCTTGGAGCTTGGCTGAACG          |
| <i>Myf5</i>       | NM_001030363.1 | F: GCAGCCACTATGAGGGAGAG<br>R: GATGTACCTGATGGCGTTCC          |
| <i>MEF2C</i>      | XM_025144794.1 | F: CCATCAGCCATCTCAACAAC<br>R: CAGCCAGTCACAGAACCAAG          |
| <i>MSTN</i>       | NM_001001461.2 | F: GCCTGGAACAAGCACCTAAC<br>R: GCTACTGTCTGCCCTCTGGA          |
| <i>MyHC I</i>     | XM_046930560.1 | F: ATCACGAGCCCTGAAACCAA<br>R: GGCTGCAAAATGCTGGAAAA          |
| <i>MyHC IIa</i>   | NM_204228.4    | F: ACTTCTATGGCAGCAACT<br>R: AATAGCGGGTGTAGGC                |
| <i>MyHC IIb</i>   | NM_001013396.2 | F: TACGGTTCTCCACTGTTGCTG<br>R: TGGATGAAGGATGGAAACAAC        |
| <i>AMPKα1</i>     | NM_001039603.2 | F: ATCTGTCTCGCCCTCATCCT                                     |

|               |                |                                                                                  |
|---------------|----------------|----------------------------------------------------------------------------------|
| <i>AMPKα2</i> | NM_001039605.2 | R: CCACTTCGCTCTTCTTACACCTT<br>F: CCAGCGAGTTCTACCTAGCCT<br>R: TGCCTTGGGACTGTCTGCA |
| <i>SIRT1</i>  | XM_046920057.1 | F: CACGCCTTGCTGTAGACTTCC<br>R: ATGAACTTGTGGCAGAGAGATGG                           |
| <i>PGC-1α</i> | XM_015285697.2 | F: CGTGGAGCAATAAAGCGAAG<br>R: TCTGAGGAGGGTCATCGTTC                               |

<sup>1</sup> *SREBP-1c*, sterol regulatory element-binding protein-1c; *ACC*, acetyl-CoA carboxylase; *FAS*, fatty acid synthase; *PPAR*, peroxisome proliferator-activated receptor; *CPT-1*, carnitine palmitoyl transferase 1; *C/EBP*, CCAAT/enhancer binding protein; *Nrf2*, nuclear factor erythroid 2-related factor 2; *HO-1*, heme oxygenase 1; *GPX1*, glutathione peroxidase; *Cu/Zn SOD*, superoxide dismutase; *CAT*, catalase; *CaN*, calcineurin; *CaM*, calmodulin; *NFATc1*, nuclear factor of activated T cells c1; *MyoD*, myogenic differentiation antigen; *Myf5*, myogenic regulatory factors 5; *MEF2C*, myocyte enhancer factor 2C; *MSTN*, myostatin; *MyHC*, myosin heavy chain; *AMPK*, adenosine 5'-monophosphate-activated protein kinase; *SIRT1*, sirtuin 1; *PGC-1α*, peroxisome proliferator-activated receptor-γ coactivator-1α.
